# Supplementary material
Source: PubMed Central journal article supplement (PMC2939275)
Supplement: NIHMS231074-supplement-1_si_001.pdf [file NIHMS231074-supplement-1_si_001.pdf]

# Sequential Layer Analysis of Protein Immunosensors based on Single Wall Carbon Nanotube Forests

Ruchika Malhotra, Fotios Papadimitrakopoulos and James F. Rusling

## Supporting Information:

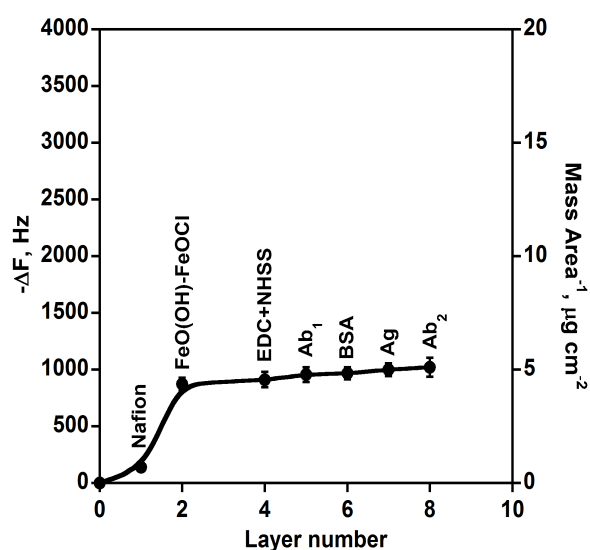

**Figure S1.** QCM frequency shifts (left) and mass per unit area (right) of layers in PSA-control sensor (without SWNT forests) assembled on gold resonators: 1. Nafion; 2. FeO(OH)-FeOCl/ Nafion bilayer; 4. 400 mM EDC and 100 mM NHSS in water; 5. after addition (non-covalent linkage) of 2 nmol mL<sup>-1</sup> primary anti-PSA antibody (Ab<sub>1</sub>) in 0.05% Tween-20 PBS buffer; 6. adsorption of 2% BSA in 0.05% Tween-20 PBS buffer onto antibody; 7. adsorption of 40 ng mL<sup>-1</sup> PSA in calf serum; 8. adsorption of 4 pmol mL<sup>-1</sup> Ab<sub>2</sub>-HRP in PBS containing 0.05% Tween-20.

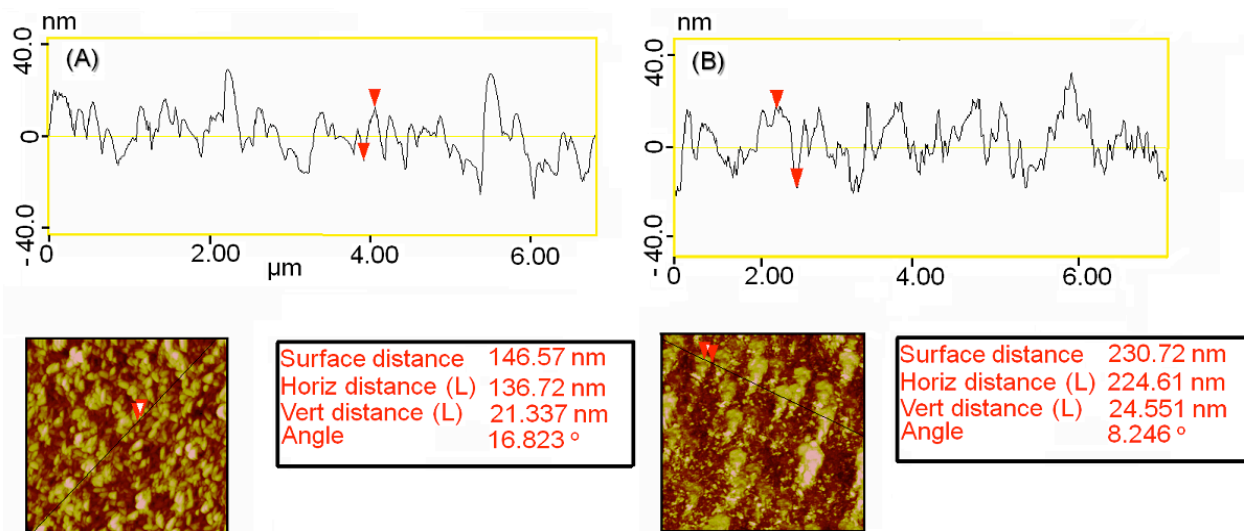

**Figure S2.** Section analysis of layers in sensor fabrication and use: (A) Nafion/ FeO(OH)-FeOCl bilayer; (B) SWNT forests on Nafion/ FeO(OH)-FeOCl bilayer conducted by moving two cursors along reference line shown until they arrive at the opposite sides of a typical peak corresponding to a bundle of SWNTs. Vertical distance between the two cursors indicate the vertical height of each layer from the surface (mica).

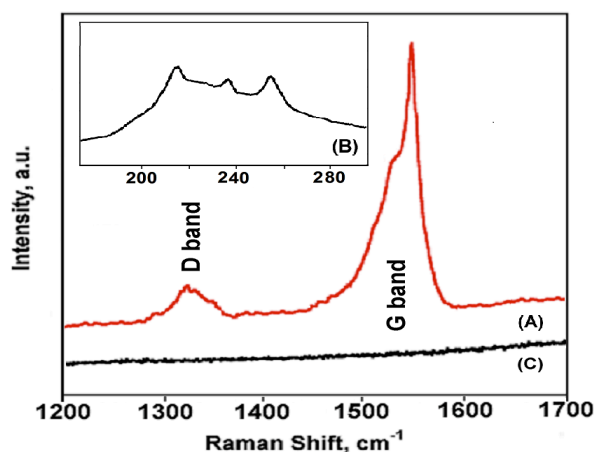

**Figure S3.** Resonance Raman spectra (785 nm excitation) of (A) Nafion/FeO(OH)-FeOCl/SWNT forests on mica with D-band at  $1330\text{ cm}^{-1}$  and G-band at  $1550\text{ cm}^{-1}$ ; (B) RBM bands in the low frequency region at  $212\text{ cm}^{-1}$ ,  $235\text{ cm}^{-1}$ , and  $256\text{ cm}^{-1}$ ; (C) control, bare mica.

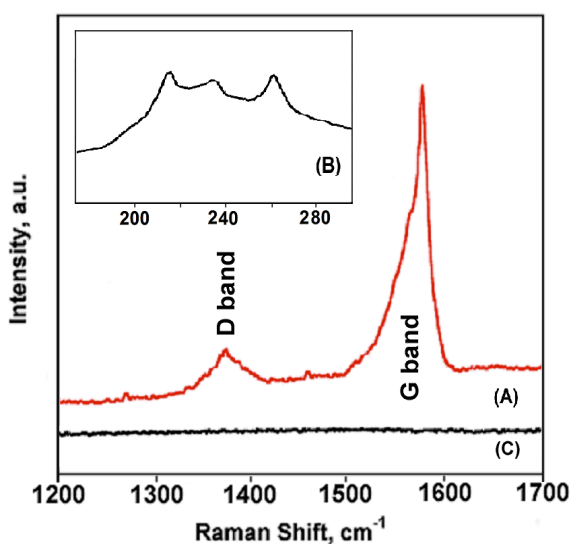

**Figure S4.** Laser Raman spectra (785 nm excitation) of (A) Nafion/FeO(OH)-FeOCl/SWNT forests on glass substrate with D-band at  $1380\text{ cm}^{-1}$  and G-band at  $1580\text{ cm}^{-1}$ ; (B) RBM bands at  $210\text{ cm}^{-1}$ ,  $236\text{ cm}^{-1}$ , and  $265\text{ cm}^{-1}$ ; (C) control, bare glass.

Using ferrocyanide in 0.1 M KCl as a probe, we used cyclic voltammetry and the Randles–Sevcik equation to estimate surface areas for the bare PG underlayer and the SWNT forests. Specifically, values were SWNT forests,  $0.29\text{ cm}^2$  and PG  $0.14\text{ cm}^2$
